# Supplementary material for: Latent Profile Analysis and Determinants of Social Isolation among Older Adults in China
Source: Research Square preprint supplement (doi:10.21203/rs.3.rs-7756154/v1), 2025-11-19
Supplement: Supplementary file 1 [file bc1af90a065955be32f9db8b.docx]

**General Questionnaire**

1.**General Situation**

| Name： | Gender:□male　□female |
| --- | --- |
| Age： | ID number： |
| Ethnic group: | Contact number： |
| Occupation:□cadre  □worker  □farmer □cultural worker □other | |
| Highest education:□No Formal Education □Primary School □Junior High School　□Senior High School □College Degree or Above □Other | |
| Marital status：□Never Married　□Married　□Divorced　□Widowed □Other | |
| Children: □ Have no Children  □Have Son,Number □Have Daughter,Number □ Adopted □ Have not Given Birth | |
| Living Arrangement：□ Living Alone Without Care □Living Alone With Care □Living with Spouse □Living with Children □Other | |
| Medical Payment Method： □Government-Funded Care □Urban Health Insurance □Rural Health Insurance □Out-of-Pocket Payment | |
| Monthly Household Income：□<2,500 yuan □2,500–6,500 yuan□6,500–25,000 yuan □more than 25000 yuan | |

2.**Health Conditions**

| History of disease | □stroke □encephalitis □head trauma □high blood pressure  □diabetes □hypercholesterolemia □coronary heart diseas  □other  Whether there is coexistence of multiple diseases:  (≥2 chronic diseases)  □yes □none | |
| --- | --- | --- |
| Family history | □none | |
| □there is | □high blood pressure □diabetes  □coronary heart disease □stroke  □chronic obstructive pulmonary disease  □malignancy □hepatitis  □severe mental illness □tuberculosis |
| History of smoking  and drinking | □yes，smoking:（time，quantity）  alcohol consumption:（time，quantity） | |
| □none | |
| Medication use  Whether there are ≥ 5 types of medication per day □ yes □ none | | |
